# Supplementary material for: Influencing factors on knowledge of aquatic pollution and waste management practices among Nigerian youths
Source: Research Square preprint supplement (doi:10.21203/rs.3.rs-8408696/v1), 2026-02-05
Supplement: Supplementary file 1 [file 2473ea4ccde0da6d36066948.docx]

**Supplementary**

**Table S1: Waste production level across significant sociodemographic survey**

| **Characteristics** | **Extreme waste producers** | **High waste producers** | **Low waste producers** | **Moderate waste producers** | **p-value2** |
| --- | --- | --- | --- | --- | --- |
|  | N=61 | N=101 | N=2101 | N=391 |  |
| **Gender** |  |  |  |  | 0.078 |
| Female | 1 (17%) | 1 (10%) | 93 (44%) | 14 (36%) |  |
| Male | 5 (83%) | 9 (90%) | 117 (56%) | 25 (64%) |  |
| **Education level** |  |  |  |  | 0.001 |
| Graduate | 4 (67%) | 2 (20%) | 131 (62%) | 22 (56%) |  |
| Others | 0 (0%) | 0 (0%) | 1 (0.5%) | 1 (2.6%) |  |
| Primary school | 0 (0%) | 0 (0%) | 1 (0.5%) | 1 (2.6%) |  |
| Secondary school | 0 (0%) | 2 (20%) | 8 (3.8%) | 8 (21%) |  |
| Undergraduate | 2 (33%) | 6 (60%) | 69 (33%) | 7 (18%) |  |
| **Settlement** |  |  |  |  | 0.001 |
| Rural | 3 (50%) | 6 (60%) | 35 (17%) | 15 (38%) |  |
| Semi-urban | 1 (17%) | 0 (0%) | 43 (20%) | 7 (18%) |  |
| Urban | 2 (33%) | 4 (40%) | 132 (63%) | 17 (44%) |  |
| **Residential status** |  |  |  |  | 0.021 |
| Owned apartment | 4 (67%) | 5 (50%) | 58 (28%) | 12 (31%) |  |
| Rented apartment (living alone) | 0 (0%) | 3 (30%) | 66 (31%) | 19 (49%) |  |
| Rented apartment (not living alone) | 2 (33%) | 2 (20%) | 86 (41%) | 8 (21%) |  |
| 1 n (%)  2 Pearson's Chi-squared test; Fisher's exact test | | |  |  |  |
